# Supplementary material for: Treatment of Colorectal Cancer in Certified Centers: Results of a Large German Registry Study Focusing on Long-Term Survival
Source: MDPI journal article supplement (doi:10.3390/cancers15184568), 2023-09-15
Supplement: s1 [file s1]

Supplement-Table S1 Full Results of multivariable Cox-regression for all-cause mortality according to diagnosis

|                     |           | C18 Colon |                 |                 | C20 Rectum |                 |                 |
|---------------------|-----------|-----------|-----------------|-----------------|------------|-----------------|-----------------|
|                     |           | HR        | Lower<br>95%-CI | Upper<br>95%-CI | HR         | Lower<br>95%-CI | Upper<br>95%-CI |
| Treatment in center | no        | 1.000     |                 |                 | 1.000      |                 |                 |
|                     | yes       | 0.921     | 0.887           | 0.956           | 0.978      | 0.929           | 1.029           |
| Sex                 | male      | 1.000     |                 |                 | 1.000      |                 |                 |
|                     | female    | 0.919     | 0.885           | 0.954           | 0.966      | 0.916           | 1.018           |
| Age at diagnosis    | 18- 49    | 1.000     |                 |                 | 1.000      |                 |                 |
|                     | 50-59     | 1.349     | 1.198           | 1.520           | 1.174      | 1.016           | 1.356           |
|                     | 60-69     | 1.627     | 1.457           | 1.818           | 1.523      | 1.329           | 1.746           |
|                     | 70-79     | 2.496     | 2.245           | 2.776           | 2.505      | 2.195           | 2.860           |
|                     | 80+       | 5.258     | 4.726           | 5.851           | 4.429      | 3.864           | 5.076           |
| Year of diagnosis   | 2009-2011 | 1.000     |                 |                 | 1.000      |                 |                 |
|                     | 2012-2014 | 1.022     | 0.979           | 1.066           | 1.031      | 0.974           | 1.091           |
|                     | 2015-2017 | 1.133     | 1.074           | 1.196           | 0.997      | 0.923           | 1.076           |
| UICC stage          | I         | 1.000     |                 |                 | 1.000      |                 |                 |
|                     | II        | 1.230     | 1.142           | 1.325           | 1.540      | 1.384           | 1.714           |
|                     | III       | 1.456     | 1.347           | 1.574           | 1.431      | 1.297           | 1.580           |
|                     | IV        | 4.724     | 4.394           | 5.078           | 4.361      | 3.948           | 4.816           |
|                     | X/n.s.    | 1.996     | 1.838           | 2.167           | 2.178      | 1.946           | 2.438           |
| Grade               | G1        | 1.000     |                 |                 | 1.000      |                 |                 |
|                     | G2        | 1.086     | 0.986           | 1.197           | 1.276      | 1.108           | 1.470           |
|                     | G3/4      | 1.419     | 1.283           | 1.570           | 1.723      | 1.485           | 2.000           |
|                     | GX/n.s.   | 1.088     | 0.973           | 1.218           | 1.105      | 0.946           | 1.290           |
| Lymphatic invasion  | L0        | 1.000     |                 |                 | 1.000      |                 |                 |
|                     | L1        | 1.198     | 1.138           | 1.260           | 1.385      | 1.284           | 1.493           |
|                     | LX/n.s.   | 1.942     | 1.717           | 2.196           | 2.478      | 2.097           | 2.929           |
| Vein invasion       | V0        | 1.000     |                 |                 | 1.000      |                 |                 |
|                     | V1/2      | 1.317     | 1.247           | 1.391           | 1.360      | 1.248           | 1.481           |
|                     | VX/n.s.   | 1.224     | 1.089           | 1.375           | 1.189      | 1.010           | 1.398           |

n.s.: not spezified

Supplement-Table S2 Sensitivity analyses: Unadjusted and adjusted\* hazard ratios with 95%-CI for all-cause mortality following treatment in GCS-certified colorectal cancer centers compared to treatment in non-certified hospitals

\* adjusted for age, sex, year of diagnosis, UICC-stage, grade, lymphatic, and vein invasion

|                                                                | HR    | Lower 95%-CI | Upper 95%-CI |
|----------------------------------------------------------------|-------|--------------|--------------|
| <b>C18 Colon all stages excl. unknown stage univariable</b>    | 0.889 | 0.855        | 0.924        |
| <b>C18 Colon all stages excl. unknown stage multivariable</b>  | 0.908 | 0.873        | 0.945        |
| <b>C20 Rectum all stages excl. unknown stage univariable</b>   | 0.843 | 0.799        | 0.890        |
| <b>C20 Rectum all stages excl. unknown stage multivariable</b> | 0.961 | 0.909        | 1.014        |
